# Association study of four polymorphisms in three folate-related enzyme genes with non-obstructive male infertility

Han-Chul Lee<sup>1</sup>, Yu-Mi Jeong<sup>1</sup>, Sook Hwan Lee<sup>2</sup>, Kwang Yul Cha<sup>2</sup>, Seung-Hun Song<sup>2</sup>,  
Nam Keun Kim<sup>2</sup>, Kyo Won Lee<sup>3</sup> and Suman Lee<sup>1,2,4</sup>

<sup>1</sup>Functional Genomics Lab, CHA Research Institute, Bundang Campus, College of Medicine, Pochon CHA University, Kyunggi-Do,

<sup>2</sup>Genome Research Center for Reproductive Medicine and Infertility, CHA General Hospital, Gangnam-Gu and <sup>3</sup>Kangbuk Samsung Hospital, Sungkyunkwan University School of Medicine, Seoul, Republic of Korea

<sup>4</sup>To whom correspondence should be addressed at: Functional Genomics Lab, CHA Research Institute, Bundang Campus, College of Medicine, Pochon CHA University, 222 Yatap-Dong, Bundang-Gu, Sungnam-Si, Kyunggi-Do 463-836, Republic of Korea.  
E-mail: suman@cha.ac.kr

**BACKGROUND:** Three typical folate metabolism enzymes—i.e. methylenetetrahydrofolate reductase (MTHFR), methionine synthase (MS) and MS reductase (MTRR) in the folate cycle—play a critical role in DNA synthesis and methylation reactions. We evaluated whether polymorphisms of these three enzymes are associated with non-obstructive male infertility. **METHOD:** Three hundred and sixty patients with non-obstructive infertility and 325 fertile men without any chromosomal abnormalities were included in this study. The single-nucleotide polymorphism (SNP) analysis was performed by pyrosequencing and PCR-restriction fragment length polymorphism (RFLP) analysis. **RESULTS:** The frequencies of MTHFR 677TT and MTRR 66GG genotypes were higher in non-obstructive infertile men compared with those in fertile men. By classifying 360 infertile patients into 174 azoospermia and 186 oligoasthenoteratozoospermia (OAT) subjects, the MTHFR 677TT and MS 2756GG types were significantly associated with the azoospermia group ( $P = 0.0227$  and  $0.0063$ , respectively). The frequency of MTRR 66GG was significant in the OAT group ( $P = 0.0014$  versus fertile males). **CONCLUSIONS:** By analysis of a large number of subjects and a more specific patient selection, we showed the first genetic evidence that MTHFR C677T, MS A2756G and MTRR A66G genotypes were independently associated with male infertility. Each SNP of the three enzymes may have a different impact on the folate cycle during spermatogenesis.

**Key words:** azoospermia/folate metabolism/male infertility/oligoasthenoteratozoospermia/polymorphism

## Introduction

Male infertility has been identified as the cause of a couple's inability to have children in half of the total cases. Several risk factors for male infertility have recently been identified such as chromosomal abnormalities (Dohle *et al.*, 2002), Y-chromosome microdeletions, translocation (Foresta *et al.*, 2001), cystic fibrosis transmembrane conductance regulator mutations (Anguiano *et al.*, 1992) and other genetic factors (Lee *et al.*, 2003).

Folate is essential for DNA synthesis and methylation reactions and for protein synthesis (Fang and Xiao, 2003). Homocysteine is a sulphur-containing amino acid and a metabolite of the essential amino acid methionine; it exists at a critical biochemical intersection in the folate cycle between *S*-adenosylmethionine and methionine (Figure 1).

Methylenetetrahydrofolate reductase (MTHFR) is one of the key enzymes in the remethylation and DNA synthesis pathway. MTHFR catalyses the reduction of methylenetetrahydrofolate

(5,10-methyl THF) to methyltetrahydrofolate (5-methyl THF). Methionine synthase (MS) catalyses the transfer of a methyl group from 5-methyl THF to homocysteine, which generates methionine and THF. In this pathway, 5,10-methyl THF participates in DNA synthesis through the exchange of dUTP for dTTP. MS reductase (MTRR) catalyses the reductive methylation of MS using *S*-adenosylmethionine as the methyl donor, and MTRR may also participate in DNA methylation (Gaughan *et al.*, 2001).

Folate deficiency is known to occur frequently, and the related hyperhomocysteinaemia is considered as a risk factor for various diseases, including infertility. The folate level and resultant methylation metabolism can lead to abnormal chromosome segregation. James *et al.* (1999) showed that a polymorphism of the MTHFR gene may be a direct genetic risk factor for meiotic non-disjunction such as Down's syndrome. Several single-nucleotide polymorphisms (SNPs) of folate metabolism-related genes have been identified, and these have

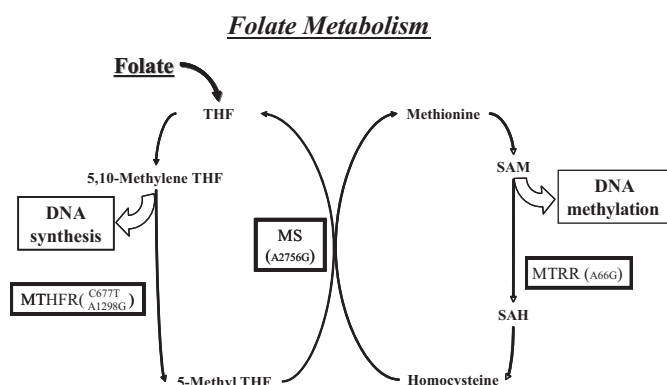

**Figure 1.** Methylene tetrahydrofolate reductase (MTHFR), methionine synthase (MS) and methionine synthase reductase (MTRR) in the folate cycle. Three enzymes of folate metabolism play an essential role in both DNA synthesis and methylation processes. MS catalyses the transfer of the methyl group from methionine and 5-methyl-tetrahydrofolate (THF) to homocysteine, and this generates tetrahydrofolate; MTRR processes the remethylation with S-adenosylmethionine as a methyl donor. MTHFR has a role in reducing THF to 5-methyl THF.

been studied to discover their implications in the pathogenesis of cardiovascular disease, neural tube defects and colorectal cancer (Frosst *et al.*, 1995; van der Put *et al.*, 1995; Slattery *et al.*, 1999; Ulvik and Ueland, 2001; Zhu *et al.*, 2003; Singh *et al.*, 2005). These SNPs include MTHFR C677T (Ueland *et al.*, 2001), MTHFR A1298C (van der Put *et al.*, 1998), MS A2756G (Chen *et al.*, 1998; Ma *et al.*, 1999) and MTRR A66G (Wilson *et al.*, 1999). Thus, these folate metabolism-associated diseases are thought to be interrelated via increased homocysteine (tHcy) and S-adenosylhomocysteine and the subsequent hypomethylation of numerous substances, including DNA and proteins. MTHFR, MS and MTRR play an important role in folate metabolism, and tHcy levels could affect DNA synthesis and methylation.

DNA methylation may be important to spermatogenesis. The number of condensed spermatids and spermatozoa in the testes was decreased when 5-azacytidine blocked the DNA methylation during spermatogenesis (Raman and Narayan, 1995), which could result in asthenozoospermia and teratozoospermia in humans (Benchabib *et al.*, 2003).

A previous report suggested that an SNP of MTHFR could be a risk factor for infertility, at least in the homozygous condition (Bezold *et al.*, 2001). Because DNA synthesis and methylation is an integral part of spermatogenesis, folate metabolism is probably important to this process. Therefore, SNPs of the MTHFR, MS and MTRR genes in the folate cycle could be related to male infertility.

In this study, we analysed the association of four SNPs (MTHFR C677T, MTHFR A1298C, MS A2756G and MTRR A66G) with non-obstructive male infertility, and the subjects were classified into the azoospermia and oligoasthenoteratozoospermia (OAT) groups.

## Materials and methods

### Patients and controls

Three hundred and twenty-five fertile men between the ages of 26 and 72 years (mean  $\pm$  SD:  $42.8 \pm 8.6$  years) who had at least one child and

who lacked any history of requiring assisted reproduction technology (ART) were included as the nation-wide control group—of which 250 men were consecutively enrolled from CHA General Hospital, the College of Medicine, Pochon CHA University (Seoul, Korea), and 100 men were from the Division of Genome Resources, the National Genome Research Institute, National Institute of Health, Korea. An informed consent was required from each subject to participate in this study.

From January 2000 to August 2003, by conducting physical examinations and hormone assays, 672 infertile men were classified as having non-obstructive infertility. The patients who were found to have cryptorchidism and varicocele via the physical examination and clinical tests were excluded from the study. Three hundred and sixty men who had no chromosome abnormality were selected for the SNP study by performing cytogenetic and Y-chromosomal microdeletion analyses (Simoni *et al.*, 1999).

These 360 non-obstructive infertile patients were classified again by performing semen analysis. Semen analysis was strictly performed according to the World Health Organization (WHO) guidelines (WHO, 1999) and also according to the criteria of Kruger *et al.* (1986). The non-obstructive infertility patient group were classified into two subtypes: 174 in azoospermia group and 186 in OAT group (130 OAT, 46 severe OAT, 4 oligozoospermia and 6 teratozoospermia), according to a sperm count of  $<20 \times 10^6/\text{ml}$  (oligozoospermia), a progressive sperm motility of  $<50\%$  (asthenozoospermia), a proportion of sperm  $<14\%$  dependent on the grade with normal morphology (teratozoospermia), a disturbance of all the three variables (OAT), a sperm count of  $<5 \times 10^6/\text{ml}$ , a progressive motility of  $<10\%$  and a proportion of  $<4\%$  with normal morphology (severe OAT) and no spermatozoa (azoospermia). The diagnosis of azoospermia (no spermatozoa in the ejaculate) was made based on two semen samples. The experiments were performed at the CHA General Hospital.

### Cytogenetic and Y-chromosome microdeletion assays

Cytogenetic analysis was performed on the metaphase spreads of cultured lymphocytes. Of the 672 non-obstructive infertile men, 312 men had abnormal chromosomes, which included Yq deletion ( $n = 102$ ), inversion ( $n = 18$ ), translocation ( $n = 26$ ), derivate ( $n = 19$ ), XXY ( $n = 129$ ) and chromosomal mosaicism ( $n = 18$ ); these patients were excluded from this SNP study (Lee *et al.*, 2003; Manti *et al.*, 2006). Only 360 infertile men who had a normal karyotype (46, XY) were finally included in this study.

For Yq deletion studies, DNA was extracted from the peripheral blood and amplified by a multi-PCR method with primers to 13 loci on the Y chromosome, including one SRY and 12 sequence-tagged sites (AZF-a region: sY 84 and sY86; AZF-b region: sY 134, sY 138 and MK5; AZF-c region: sY 152, sY 147, sY 254, sY 255, SPGY1, sY 269 and sY 158) (Simoni *et al.*, 1999; Simoni, 2001).

### The serum tHcy and folate measurement

Five millilitres of venous blood was collected from patients when they visited. The serum was promptly separated and stored by aliquots at  $-70^\circ\text{C}$  before use. The serum tHcy levels were measured by performing chemiluminescent immunoassay. The folate levels were measured by radioassay. Serum was mixed with a pH 9.4 borate dithiothreitol buffer and radioactively labelled folate ( $^{125}\text{I}$ -pteroylglutamic acid) derivative. During incubation, the labelled and unlabelled (serum) folates competed for the binding sites of the folate-binding proteins based on their concentrations. The level of  $^{125}\text{I}$ -labelled folate was measured by Gamma counter (Hewlett Packard, USA). The biochemical measurements were performed by Seoul Clinical Laboratory (SCL, Seoul, Korea). Forty-six samples were measured at the same time. The average value of serum folate and Hcy levels of Korean men was  $4.9 \text{ mg/ml}$  and  $13.9 \text{ } \mu\text{mol/l}$ , respectively (Min, 2001).

### Pyrosequencing assay for screening of MTHFR, MS and MTRR

The PCR primers were designed using PRIMER3 ([http://frodo.wi.mit.edu/cgi-bin/primer3/primer3\\_www.cgi](http://frodo.wi.mit.edu/cgi-bin/primer3/primer3_www.cgi)) and Pyrosequencing Primer SNP Design Version 1.01 software. The PCR was carried out using 50 ng of genomic DNA and 10 pmol each of the forward and reverse oligonucleotide PCR primers (Integrated Bioneer, Daejeon, Korea). The biotinylated PCR product then underwent pyrosequencing (Biotage AB) analysis for direct analysis of the SNPs in the PCR product (Supplementary table) according to the method by Ahmadian *et al.* (Ahmadian *et al.*, 2000; Park *et al.*, 2005; Chung *et al.*, 2006).

### PCR–restriction fragment length polymorphism

PCR–restriction fragment length polymorphism (RFLP) analysis was performed by following the previously reported methods (Weisberg *et al.*, 1998; Friedman *et al.*, 1999). Regions containing the polymorphisms in each gene were amplified from the genomic DNA by PCR. The C677T, A1298C, A2756G and A66G variations created the *Hinf*I, *Fnu*4HI, *Hae*III and *Nde*I restriction enzyme recognition sequences, respectively; the digested fragments were separated by 3% agarose gel electrophoresis; and the gels were visualized under UV light. The restriction enzymes were purchased from the New England Biolabs (NEB, USA).

### Statistical analysis

The statistical package used to estimate the odds ratio (OR) and 95% confidence intervals was SAS (r) Proprietary Software Release 8.1 (SAS Institute). The results for the enumeration of data (e.g. the number of individuals with the various genotypes) and the comparison of percentages between groups were evaluated with chi-squared and Fisher's exact tests (two-side). Allele frequencies were calculated by counting the alleles. ORs were calculated by the chi-squared test. *P* values <0.05 were deemed as being statistically significant.

### Results

We analysed the four polymorphisms of the MTHFR, MS and MTRR genes in 360 infertile and 325 fertile men by performing pyrosequencing and PCR-RFLP. Supplementary figure shows the results of the MTHFR C677T, MTHFR A1298C, MS A2756G and MTRR A66G analyses performed by the pyrosequencing method. Pyrosequencing is now widely used for many different types of DNA analysis. Using a four-enzyme mixture, this sequencing-by-synthesis method relies on the luminometric detection of pyrophosphate (PP<sub>i</sub>) that is released on nucleotide incorporation (Ahmadian *et al.*, 2000). To validate the MTHFR C677T, MTHFR A1298C, MS A2756G and MTRR A66G variations of the pyrosequencing data, we randomly selected 20 PCR samples and compared the pyrosequencing result with the PCR-RFLP genotypes. The PCR-RFLP results agreed with the pyrosequencing results for the fertile and infertile men (Figure 2).

The results of statistical analysis of the MTHFR C677T, MTHFR A1298C, MS A2756G and MTRR A66G for the fertile and non-obstructive infertile men are summarized in Table I. The frequencies of the homozygous MTHFR 677TT among the fertile and infertile men were 12.62 and 17.78% (*P* = 0.0481), respectively. The allelic frequency for the fertile men (12.62%) with the 677TT variation in this study was similar to the frequencies noted for healthy Koreans in other studies (12.0–14.7%) (Yoo *et al.*, 2000; Hong *et al.*, 2004; Kim *et al.*, 2004).

#### A. MTHFR 677

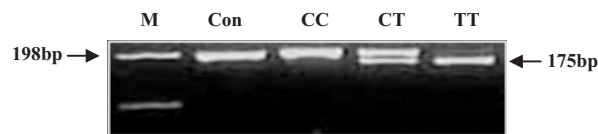

#### B. MTHFR 1298

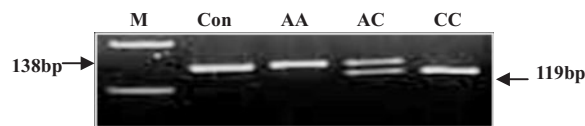

#### C. MS 2756

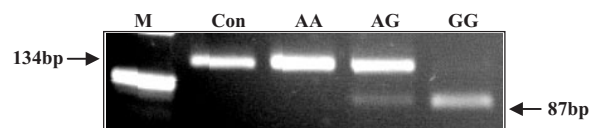

#### D. MTRR 66

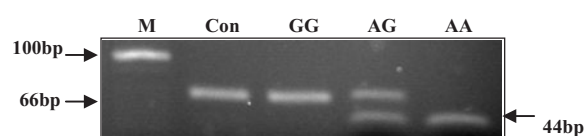

**Figure 2.** Representative restriction fragment length polymorphism (RFLP) results from the male controls and the infertile patients. PCR-RFLP analysis was carried out to confirm the pyrosequencing method. The RFLP results for MTHFR C677T (A), MTHFR A1298C (B), MS A2756G (C) and MTRR A66G (D) are shown. Each panel contains 'M' for 1 kb plus DNA ladder; 'Con' undigested PCR product as control and other single-nucleotide polymorphisms.

The frequencies of homozygous MTRR 66GG differed significantly between the fertile (8.92%) and infertile men (12.78%) (*P* = 0.0469). However, the MTHFR A1298C and MS A2756G polymorphism data, according to the case–control analysis, showed no significant differences for the individuals with infertility (*P* = 0.5689 and 0.0941, respectively). The frequencies of homozygous MTHFR A1298C (CC) and MS A2756G (GG) among the fertile and infertile men were 4.31 and 5.00%, and 1.23 and 3.06%, respectively.

The analysed MTHFR C677T, MTHFR A1298C, MS A2756G and MTRR A66G variations in the azoospermia group are summarized in Table II. We observed statistical differences among these SNPs. The frequencies of MTHFR C677T of all types (CT, TT and CT + TT) and the homozygous form of MS A2756G (GG) in the infertile men with azoospermia had statistical significance (MTHFR C677T: CT, *P* = 0.0267; TT, *P* = 0.0227; CT + TT, 0.0122; and MS A2756G: GG; *P* = 0.0063). However, all the allelic types of MTRR A66G and MTHFR A1298C were not statistically significant.

The allelic frequency of the four SNPs in the OAT group is listed in Table III. Three SNPs (MTHFR C677T, MTHFR A1298C and MS A2756G) were not associated with the OAT group, but MTRR A66G was highly associated with the OAT group. The frequency of MTRR 66GG was statistically increased in the OAT group (*P* = 0.0014).

**Table I.** Distribution of the methylenetetrahydrofolate reductase (MTHFR) C677T, MTHFR A1298C, methionine synthase (MS) A2756G and methionine synthase reductase (MTRR) A66G genotypes in the infertile and fertile men

|            | Fertile men ( <i>n</i> = 325) | Infertile men ( <i>n</i> = 360) | OR (95% CI)      | <i>P</i>            |
|------------|-------------------------------|---------------------------------|------------------|---------------------|
| MTHFR 677  |                               |                                 |                  |                     |
| 677CC      | 36.31% ( <i>n</i> = 118)      | 31.94 % ( <i>n</i> = 115)       | –                | –                   |
| 677CT      | 51.08% ( <i>n</i> = 166)      | 50.28% ( <i>n</i> = 181)        | 1.12 (0.80–1.56) | 0.5076              |
| 677TT      | 12.62% ( <i>n</i> = 41)       | 17.78% ( <i>n</i> = 64)         | 1.60 (1.00–2.56) | 0.0481 <sup>a</sup> |
| CT + TT    | 63.69% ( <i>n</i> = 207)      | 68.06% ( <i>n</i> = 245)        | 1.21 (0.88–1.67) | 0.2287              |
| MTHFR 1298 |                               |                                 |                  |                     |
| 1298AA     | 65.54% ( <i>n</i> = 213)      | 61.67% ( <i>n</i> = 222)        | –                | –                   |
| 1298AC     | 30.15% ( <i>n</i> = 98)       | 33.33% ( <i>n</i> = 120)        | 1.17 (0.85–1.63) | 0.3331              |
| 1298CC     | 4.31% ( <i>n</i> = 14)        | 5.00% ( <i>n</i> = 18)          | 1.23 (0.60–2.54) | 0.5689              |
| AC + CC    | 34.46% ( <i>n</i> = 112)      | 38.33% ( <i>n</i> = 138)        | 1.18 (0.87–1.62) | 0.2932              |
| MS 2756    |                               |                                 |                  |                     |
| 2756AA     | 78.46% ( <i>n</i> = 255)      | 75.00% ( <i>n</i> = 270)        | –                | –                   |
| 2756AG     | 20.31% ( <i>n</i> = 66)       | 21.94% ( <i>n</i> = 79)         | 1.13 (0.78–1.63) | 0.5146              |
| 2756GG     | 1.23% ( <i>n</i> = 4)         | 3.06% ( <i>n</i> = 11)          | 2.60 (0.82–8.26) | 0.0941              |
| AG + GG    | 21.54% ( <i>n</i> = 70)       | 25.00% ( <i>n</i> = 90)         | 1.21 (0.85–1.73) | 0.2850              |
| MTRR 66    |                               |                                 |                  |                     |
| 66AA       | 22.15% ( <i>n</i> = 72)       | 17.78% ( <i>n</i> = 64)         | –                | –                   |
| 66AG       | 68.92% ( <i>n</i> = 224)      | 69.44% ( <i>n</i> = 250)        | 1.26 (0.86–1.84) | 0.2424              |
| 66GG       | 8.92% ( <i>n</i> = 29)        | 12.78% ( <i>n</i> = 46)         | 1.78 (1.01–3.17) | 0.0469 <sup>a</sup> |
| AG + GG    | 77.75% ( <i>n</i> = 253)      | 82.22% ( <i>n</i> = 296)        | 1.32 (0.90–1.92) | 0.1516              |

OR, odds ratio; CI, confidence interval.

<sup>a</sup>Significant *P* values were noted compared with those of the fertile male group (*P* < 0.05).**Table II.** Genotype and allelic frequencies for MTHFR C677T, MTHFR A1298C, MS A2756G and MTRR A66G in the azoospermia group (*n* = 174)

| Gene      | Azoospermia                       | Allele type             |                          |                         |                          |
|-----------|-----------------------------------|-------------------------|--------------------------|-------------------------|--------------------------|
|           |                                   | 677CC                   | 677CT                    | 677TT                   | CT +TT                   |
| MTHFR677  | Frequency (%) ( <i>n</i> = 174)   | 25.29 ( <i>n</i> = 44)  | 57.47 ( <i>n</i> = 100)  | 17.24 ( <i>n</i> = 30)  | 74.71 ( <i>n</i> = 130)  |
|           | OR (95% CI)                       | –                       | 1.62 (1.06–2.47)         | 1.96 (1.09–3.52)        | 1.68 (1.12–2.54)         |
|           | <i>P</i>                          | –                       | 0.0267 <sup>a</sup>      | 0.0227 <sup>a</sup>     | 0.0122 <sup>a</sup>      |
|           | Fertile men (%) ( <i>n</i> = 325) | 36.31 ( <i>n</i> = 118) | 51.08% ( <i>n</i> = 166) | 12.62% ( <i>n</i> = 41) | 63.69% ( <i>n</i> = 207) |
| MTHFR1298 | Frequency (%) ( <i>n</i> = 174)   | 62.64 ( <i>n</i> = 109) | 32.76 ( <i>n</i> = 57)   | 4.60 ( <i>n</i> = 8)    | 37.36 ( <i>n</i> = 65)   |
|           | OR (95% CI)                       | –                       | 1.14 (0.76–1.70)         | 1.12 (0.45–2.74)        | 1.13 (0.77–1.66)         |
|           | <i>P</i>                          | –                       | 0.5302                   | 0.8098                  | 0.5195                   |
|           | Fertile men (%) ( <i>n</i> = 325) | 65.54 ( <i>n</i> = 213) | 30.15 ( <i>n</i> = 98)   | 4.31 ( <i>n</i> = 14)   | 34.46 ( <i>n</i> = 112)  |
| MS2756    | Frequency (%) ( <i>n</i> = 174)   | 71.26 ( <i>n</i> = 124) | 23.56 ( <i>n</i> = 41)   | 5.17 ( <i>n</i> = 9)    | 28.74 ( <i>n</i> = 50)   |
|           | OR (95% CI)                       | –                       | 1.28 (0.82–2.00)         | 4.63 (1.40–15.31)       | 1.47 (0.96–2.24)         |
|           | <i>P</i>                          | –                       | 0.2800                   | 0.0063 <sup>a</sup>     | 0.0730 <sup>b</sup>      |
|           | Fertile men (%) ( <i>n</i> = 325) | 78.46 ( <i>n</i> = 255) | 20.31 ( <i>n</i> = 66)   | 1.23 ( <i>n</i> = 4)    | 21.54 ( <i>n</i> = 70)   |
| MTRR66    | Frequency (%) ( <i>n</i> = 174)   | 21.84 ( <i>n</i> = 38)  | 69.54 ( <i>n</i> = 121)  | 8.62 ( <i>n</i> = 15)   | 78.16 ( <i>n</i> = 136)  |
|           | OR (95% CI)                       | –                       | 1.02 (0.65–1.61)         | 0.98 (0.47–2.05)        | 1.02 (0.65–1.59)         |
|           | <i>P</i>                          | –                       | 0.9196                   | 0.9572                  | 0.9356                   |
|           | Fertile men (%) ( <i>n</i> = 325) | 22.15 ( <i>n</i> = 72)  | 68.92 ( <i>n</i> = 224)  | 8.92 ( <i>n</i> = 29)   | 77.85 ( <i>n</i> = 253)  |

<sup>a</sup>Statistically significant *P* values were noted compared to the fertile male group (*P* < 0.05).<sup>b</sup>Not significant (*P* > 0.05), but showed a statistical tendency.

We analysed the gene-to-gene correlation between three genes (MTHFR 677, MS and MTRR) in the azoospermia and OAT groups (Table IV). In the azoospermia group, the MS 2756GG type was significantly associated with the MTHFR 677CC type. When the genotype of MTHFR 677 was the CC homozygote, the frequency of the MS 2756GG genotype was significantly increased (*P* = 0.0184). This result demonstrated that both the MTHFR 677TT and MS 2756GG types independently contribute to azoospermia. However, in the OAT

group, all the genotypes of MTHFR C677T and MS A2756G were not associated with the MTRR A66G genotypes.

The frequency of the MS A2756G genotypes, according to each of the MTHFR C677T genotypes, between the control group and the azoospermic group are shown in Figure 3. The fertile men with the MTHFR 677CC genotypes did not have the MS 2756GG types, and this was statistically significant (*P* = 0.0184); yet the azoospermia group with the MTHFR 677CC genotypes did have the MS 2756GG types (4.6%). In

**Table III.** Genotype and allele frequencies for MTHFR C677T, MTHFR A1298C, MS A2756G and MTRR A66G in the oligoasthenoteratozoospermia (OAT) group (*n* = 186)

| Gene      | OAT <sup>a</sup>                  | Allele type             |                         |                        |                         |
|-----------|-----------------------------------|-------------------------|-------------------------|------------------------|-------------------------|
|           |                                   | 677CC                   | 677CT                   | 677TT                  | CT + TT                 |
| MTHFR677  | Frequency (%) ( <i>n</i> = 186)   | 38.17 ( <i>n</i> = 71)  | 43.55 ( <i>n</i> = 81)  | 18.28 ( <i>n</i> = 34) | 61.83 ( <i>n</i> = 115) |
|           | OR (95% CI)                       | –                       | 0.81 (0.55–2.21)        | 1.38 (0.80–2.37)       | 0.92 (0.64–1.34)        |
|           | <i>P</i>                          | –                       | 0.3000                  | 0.2449                 | 0.6745                  |
|           | Fertile men (%) ( <i>n</i> = 325) | 36.31 ( <i>n</i> = 118) | 51.08 ( <i>n</i> = 166) | 12.62 ( <i>n</i> = 41) | 63.69 ( <i>n</i> = 207) |
| MTHFR1298 | Frequency (%) ( <i>n</i> = 186)   | 1298AA                  | 1298AC                  | 1298CC                 | AC + CC                 |
|           | OR (95% CI)                       | 60.75 ( <i>n</i> = 113) | 33.87 ( <i>n</i> = 63)  | 5.38 ( <i>n</i> = 10)  | 39.25 ( <i>n</i> = 73)  |
|           | <i>P</i>                          | –                       | 1.21 (0.82–1.79)        | 1.35 (0.58–3.13)       | 1.23 (0.85–1.78)        |
|           | Fertile men (%) ( <i>n</i> = 325) | –                       | 0.3343                  | 0.4879                 | 0.2788                  |
| MS2756    | Frequency (%) ( <i>n</i> = 186)   | 65.54 ( <i>n</i> = 213) | 30.15 ( <i>n</i> = 98)  | 4.31 ( <i>n</i> = 14)  | 34.46 ( <i>n</i> = 112) |
|           | OR (95% CI)                       | 2756AA                  | 2756AG                  | 2756GG                 | AG + GG                 |
|           | <i>P</i>                          | 78.49 ( <i>n</i> = 146) | 20.43 ( <i>n</i> = 38)  | 1.08 ( <i>n</i> = 2)   | 21.51 ( <i>n</i> = 40)  |
|           | Fertile men (%) ( <i>n</i> = 325) | –                       | 1.01 (0.64–1.57)        | 0.87 (0.16–4.83)       | 1.00 (0.64–1.55)        |
| MTRR66    | Frequency (%) ( <i>n</i> = 186)   | –                       | 0.9805                  | 0.8765                 | 0.9930                  |
|           | OR (95% CI)                       | 78.46 ( <i>n</i> = 255) | 20.31 ( <i>n</i> = 66)  | 1.23 ( <i>n</i> = 4)   | 21.54 ( <i>n</i> = 70)  |
|           | <i>P</i>                          | 1298AA                  | 1298AG                  | 1298GG                 | AG + GG                 |
|           | Fertile men (%) ( <i>n</i> = 325) | 13.98 ( <i>n</i> = 26)  | 69.35 ( <i>n</i> = 129) | 16.67 ( <i>n</i> = 31) | 86.02 ( <i>n</i> = 160) |
|           | Frequency (%) ( <i>n</i> = 186)   | –                       | 1.59 (0.97–2.62)        | 2.96 (1.51–5.82)       | 1.75 (1.07–2.86)        |
|           | OR (95% CI)                       | –                       | 0.0648 <sup>c</sup>     | 0.0014 <sup>b</sup>    | 0.0239 <sup>b</sup>     |
|           | <i>P</i>                          | –                       | 0.0014 <sup>b</sup>     | 0.0014 <sup>b</sup>    | 0.0239 <sup>b</sup>     |
|           | Fertile men (%) ( <i>n</i> = 325) | 22.15 ( <i>n</i> = 72)  | 68.92 ( <i>n</i> = 224) | 8.92 ( <i>n</i> = 29)  | 77.85 ( <i>n</i> = 253) |

OR, odds ratio; CI, confidence interval.  
<sup>a</sup>Including OAT, severe OAT, oligozoospermia and teratozoospermia.  
<sup>b</sup>Statistically significant *P* values were noted compared with those of the fertile male group (*P* < 0.05).  
<sup>c</sup>Not significant (*P* > 0.05), but showed a tendency towards significance.

the MTHFR 677CT and TT types, the MS 2756GG homozygote was not significantly increased in azoospermia group, although those with the MTHFR 677CT genotype showed a trend towards increased MS 2756GG types (*P* = 0.0555).

To determine the effect of each SNP, we investigated the sperm quality according to the genotype of the three folate metabolism-related genes in the OAT subjects (*n* = 186). The sperm number, motility, vitality and morphology of the OAT group are summarized in Table V based on their genotypes. The number, motility and vitality of sperm were somewhat dependent on the MTHFR C677T and MTRR A66G genotypes, but there were no significant associations (*P* > 0.05).

We focused on investigating the genotypes of the folate-related enzymes, but the tHcy and folate levels of the patients were also important. Therefore, we tried to measure the average value of tHcy and folate levels to investigate any physiological association between the genotype of folate-related enzymes and serum level. Forty-six patients were selected according to MTHFR genotypes (18 with CC, 15 with CT and 13 with TT) for biochemical assays (Table VI). We measured tHcy and folate levels from the frozen sera at the same time. The tHcy level ranged from 9.14 to 13.22 μmol/l, and the folate level ranged from 4.06 to 8.98 ng/ml in all 46 patients, which were in the normal range. The folate and tHcy levels did not differ significantly with the genotypes of the folate metabolism enzymes by statistical analysis (Table VI).

Discussion

In this study, we analysed the association of the four SNPs of three genes in the folate cycle of infertile men, and the prevalence of

three SNPs (MTHFR C677T, MS A2756G and MTRR A66G) was associated with non-obstructive male infertility.

Four previous studies (Bezold *et al.*, 2001; Ebisch *et al.*, 2003; Stuppia *et al.*, 2003; Singh *et al.*, 2005) have evaluated the association of MTHFR polymorphism in infertile patients of Western Europe, Italy and India. Bezold *et al.* and Singh *et al.* have reported that the frequency of the TT homozygote and the CT heterozygote of MTHFR C677T was significant in the infertile patients. Bezold *et al.* showed that the frequency of the TT homozygote in the infertile patient was increased by 9.3% comparing to that of control group, but the frequency of the CT heterozygote was decreased by 8% in Germany. However, in the article by Singh *et al.*, the CT heterozygote and TT homozygote in the infertile patients were each increased by 8 and 4%, respectively. Ebisch *et al.* concluded that the C677T polymorphism is not a risk factor for male factor subfertility and also indicated the importance of folates in sperm production. Stuppia *et al.* reported that there was no significant difference in the frequency of the CT heterozygote and the C and T homozygotes and also suggested that some gene(s) other than the MTHFR gene in the DNA methylation pathway could affect the male infertility.

Our study had many subjects in the control and patient groups (*N* = 685), and it gave more details of the inclusion and exclusion criteria for the patient selection. We selected the patients by performing cytogenetic and Yq deletion analyses and classified the patients without any chromosomal abnormalities into two groups by the existence or non-existence of spermatozoa. One group of azoospermia patients had no spermatozoa in the ejaculate, and the other group was OAT patients that included unexplained OAT, severe OAT and teratozoospermia.

**Table IV.** Gene-to-gene interaction analyses for MTHFR C677T, MS A2756G and MTRR A66G in the azoospermia group and the oligoasthenoteratozoospermia (OAT) group

| Patient group     | SNP       | Allele type |         | CT                  |                     |                     |                 |            |            | TT                  |                 |           |           |        |                 |
|-------------------|-----------|-------------|---------|---------------------|---------------------|---------------------|-----------------|------------|------------|---------------------|-----------------|-----------|-----------|--------|-----------------|
|                   |           |             |         | CC                  |                     |                     | CT              |            |            | CT                  |                 |           | TT        |        |                 |
|                   |           |             |         | C% <sup>c</sup> (n) | P% <sup>d</sup> (n) | P                   | OR (95%CI)      | C% (n)     | P% (n)     | P                   | OR (95%CI)      | C% (n)    | P% (n)    | P      | OR (95%CI)      |
| Azoospermia group | MTHFR677  | MS 2756     | AA      | 78.8 (93)           | 72.7 (32)           | –                   | –               | 75.9 (126) | 68.0 (68)  | –                   | –               | 87.8 (36) | 80.0 (24) | –      | –               |
|                   |           |             | AG      | 21.2 (25)           | 22.7 (10)           | 0.7240              | 1.16 (0.5–2.7)  | 21.7 (36)  | 25.0 (25)  | 0.4012              | 1.29 (0.7–2.3)  | 12.2 (5)  | 20.0 (6)  | 0.3683 | 1.8 (0.5–6.6)   |
|                   |           |             | GG      | 0 (0)               | 4.6 (2)             | 0.0184 <sup>a</sup> | –               | 2.4 (4)    | 7.0 (7)    | 0.0555 <sup>b</sup> | 3.24 (0.4–11.9) | 0 (0)     | 0 (0)     | –      | –               |
|                   | MTRR 66   | AG + GG     | AA      | 21.2 (25)           | 27.3 (12)           | 0.4118              | 1.4 (0.6–3.1)   | 24.1 (40)  | 32.0 (32)  | 0.1599              | 1.48 (0.9–2.6)  | –         | –         | –      | –               |
|                   |           |             | AG      | 23.7 (28)           | 27.3 (12)           | –                   | –               | 21.7 (36)  | 21.0 (21)  | –                   | –               | 19.5 (8)  | 16.7 (5)  | –      | –               |
|                   |           |             | GG      | 67.8 (80)           | 65.9 (29)           | 0.6810              | 0.85 (0.4–1.9)  | 68.7 (114) | 71.0 (71)  | 0.8345              | 1.07 (0.6–2.0)  | 73.2 (30) | 70.0 (21) | 0.8588 | 1.12 (0.3–3.9)  |
|                   | MTRR 66   | AG + GG     | AA      | 8.5 (10)            | 6.8 (3)             | 0.6302              | 0.7 (0.2–3.0)   | 9.6 (16)   | 8.0 (8)    | 0.7636              | 0.86 (0.3–2.3)  | 7.3 (3)   | 13.3 (4)  | 0.4231 | 2.13 (0.3–13.8) |
|                   |           |             | AG      | 76.3 (90)           | 72.7 (32)           | 0.6417              | 0.83 (0.4–1.8)  | 78.3 (130) | 79.0 (79)  | 0.8948              | 1.04 (0.6–1.9)  | 80.5 (33) | 83.3 (25) | 0.7594 | 1.21 (0.4–4.2)  |
|                   |           |             | GG      | –                   | –                   | –                   | –               | –          | –          | –                   | –               | –         | –         | –      | –               |
|                   | MTRR 66   | AG + GG     | AA      | –                   | –                   | –                   | –               | –          | –          | –                   | –               | –         | –         | –      | –               |
| OAT group         | MTHFR 677 | CC          | CT      | 38.9 (28)           | 50.0 (13)           | –                   | –               | 35.7 (80)  | 36.4 (47)  | –                   | –               | 44.5 (10) | 35.5 (11) | –      | –               |
|                   |           |             | CT      | 50.0 (36)           | 46.2 (12)           | 0.4828              | 0.72 (0.3–1.8)  | 50.9 (114) | 41.9 (54)  | 0.3832              | 0.81 (0.5–1.3)  | 55.2 (16) | 48.4 (15) | 0.7775 | 0.85 (0.3–2.6)  |
|                   |           |             | TT      | 11.1 (8)            | 3.8 (1)             | 0.2127              | 0.27 (0.03–2.4) | 13.4 (30)  | 21.7 (28)  | 0.1476              | 1.59 (0.8–3.0)  | 10.3 (3)  | 16.1 (5)  | 0.6243 | 1.52 (0.3–8.0)  |
|                   | MS 2756   | CT + TT     | CT + TT | 61.1 (44)           | 50.0 (13)           | 0.3249              | –               | 64.3 (144) | 63.6 (82)  | 0.8921              | 0.97 (0.6–1.5)  | 65.5 (19) | 64.5 (20) | 0.9352 | 0.96 (0.3–2.8)  |
|                   |           |             | AA      | 75.0 (54)           | 76.9 (20)           | –                   | –               | 79.0 (177) | 79.8 (103) | –                   | –               | 82.8 (24) | 74.2 (23) | –      | –               |
|                   |           |             | AG      | 25.0 (18)           | 23.1 (6)            | 0.8450              | 0.9 (0.3–2.6)   | 19.2 (43)  | 19.4 (25)  | 0.9974              | 1.0 (0.6–1.7)   | 17.2 (5)  | 22.6 (7)  | 0.5611 | 1.46 (0.4–5.3)  |
|                   | MTRR 66   | GG          | GG      | 0 (0)               | 0 (0)               | –                   | –               | 1.8 (4)    | 0.8 (1)    | 0.4396              | 0.43 (0.05–3.9) | 0 (0)     | 3.2 (1)   | 0.3122 | –               |
|                   |           |             | AG + GG | –                   | –                   | –                   | –               | 21.0 (47)  | 20.2 (26)  | 0.8534              | 0.95 (0.6–1.6)  | 17.2 (5)  | 25.8 (8)  | 0.4210 | 1.67 (0.5–5.9)  |
|                   |           |             | GG      | –                   | –                   | –                   | –               | –          | –          | –                   | –               | –         | –         | –      | –               |
|                   | MTRR 66   | AG + GG     | AA      | –                   | –                   | –                   | –               | –          | –          | –                   | –               | –         | –         | –      | –               |
|                   |           |             | AG      | –                   | –                   | –                   | –               | –          | –          | –                   | –               | –         | –         | –      | –               |
|                   |           |             | GG      | –                   | –                   | –                   | –               | –          | –          | –                   | –               | –         | –         | –      | –               |

<sup>a</sup>Significant *P* values were noted compared with those of the fertile male group (*P* < 0.05).<sup>b</sup>Not significant (*P* > 0.05) but showed a tendency towards significance.<sup>c</sup>Percentage of the fertile men.<sup>d</sup>Percentage of the infertile men.



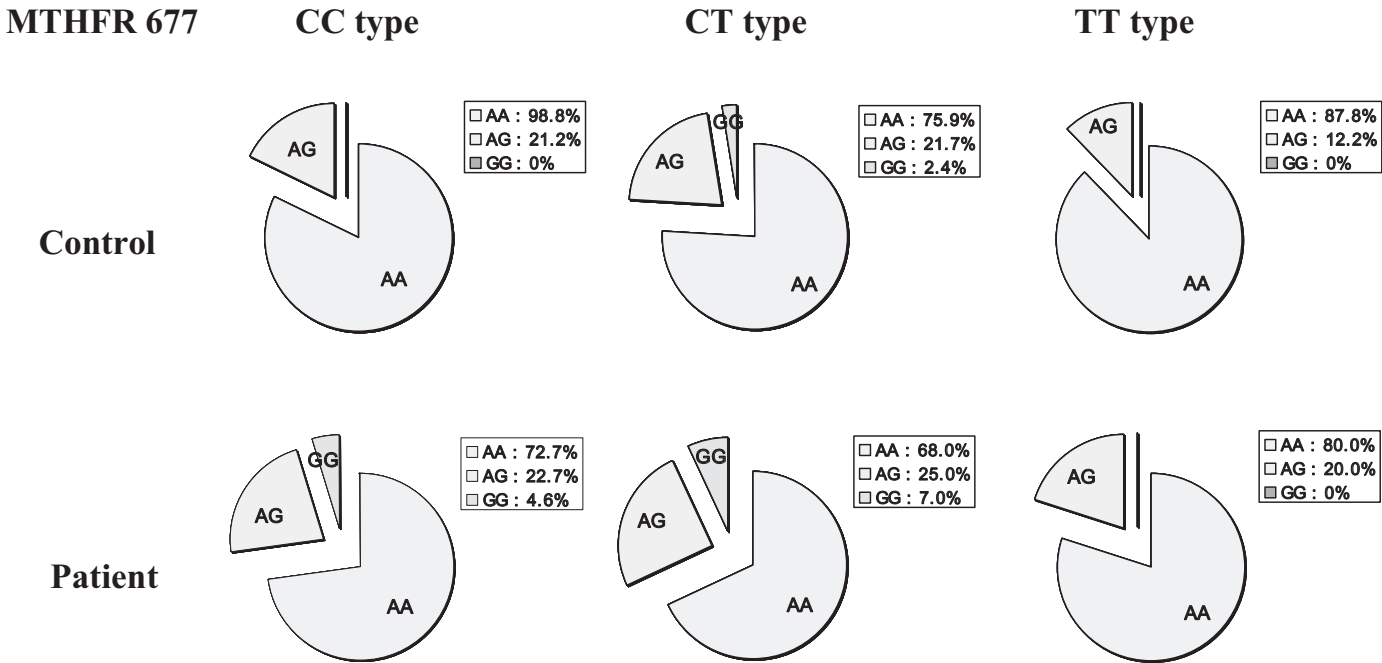

**Figure 3.** The frequency of the MS A2756G genotypes according to the MTHFR C677T genotypes for the control and the azoospermic groups. When the MTHFR C677T genotype was the CC homozygote, the MS 2756GG homozygote was significantly increased in the azoospermia group ( $P = 0.0184$ ).

**Table V.** Sperm count, motility, vitality and morphology according to genotype of each folate metabolism-related gene in the oligoasthenoteratozoospermia (OAT) group ( $n = 186$ )

| Genotype       |                                   | AA (n = 26)   | AG (n = 129)  | GG (n = 31)    | P value |
|----------------|-----------------------------------|---------------|---------------|----------------|---------|
| MTRR 66        | Sperm count (10 <sup>6</sup> /ml) | 40.29 (±39.5) | 61.89 (±58.8) | 42.97 (±35.6)  | >0.05   |
|                | Motility (%)                      | 32.56 (±14.6) | 31.50 (±13.6) | 26.47 (±14.4)  | >0.05   |
|                | Vitality (%)                      | 51.30 (±18.5) | 51.12 (±15.3) | 49.23 (±12.6)  | >0.05   |
|                | Morphology (%)                    | 2.67 (±2.2)   | 3.04 (±6.9)   | 3.60 (±4.3)    | >0.05   |
| MTHFR 677      | Genotype                          | CC (n = 71)   | CT (n = 81)   | TT (n = 34)    |         |
|                | Sperm count (10 <sup>6</sup> /ml) | 60.71 (±54.5) | 57.78 (±57.5) | 47.93 (±49.0)  | >0.05   |
|                | Motility (%)                      | 32.12 (±13.9) | 32.44 (±13.5) | 27.62 (±14.8)  | >0.05   |
|                | Vitality (%)                      | 53.49 (±16.0) | 49.92 (±14.6) | 48.96 (±15.4)  | >0.05   |
| MTHFR 1298     | Genotype                          | TT (n = 113)  | TG (n = 63)   | GG (n = 10)    |         |
|                | Sperm count (10 <sup>6</sup> /ml) | 52.18 (±58.0) | 69.86 (±47.8) | 37.57 (±43.7)  | NE      |
|                | Motility (%)                      | 31.17 (±14.2) | 32.73 (±13.6) | 32 (±13.5)     | NE      |
|                | Vitality (%)                      | 50.11 (±15.6) | 52.56 (±14.8) | 51.14 (±15.9)  | NE      |
| MS 2756        | Genotype                          | AA (n = 146)  | AG (n = 38)   | GG (n = 2)     |         |
|                | Sperm count (10 <sup>6</sup> /ml) | 61.08 (±53.4) | 34.46 (±32.8) | 100.5 (±115.3) | NE      |
|                | Motility (%)                      | 30.49 (±13.4) | 36.96 (±15.3) | 31.75 (±12.6)  | NE      |
|                | Vitality (%)                      | 50.27 (±15.7) | 54.86 (±13.8) | 47.25 (±13.0)  | NE      |
| Morphology (%) |                                   | 2.54 (±3.0)   | 5.35 (±12.6)  | 2.75 (±0.8)    | NE      |

NE, not estimated.  
The values in the parenthesis indicate the standard deviation.

Folate deficiency has been shown to reduce the proliferation of various cell types (Blount *et al.*, 1997; Zhu and Melera, 2001). The activities of the folate metabolism-related enzymes are affected by the SNP genotype (Weisberg *et al.*, 1998; Gaughan *et al.*, 2001; Jacques *et al.*, 2003). We conducted a case–control study to investigate the association of nutrient intake in the one-carbon pathway of folate for DNA synthesis and methylation reactions. The folate intake is important for male infertility, and this level in human serum

may differ in different countries. The average of folate intake in Korea is about 347 µg/day, which is a similar to other world regions ([http://europa.eu.int/comm/food/fs/sc/scf/index\\_en.html](http://europa.eu.int/comm/food/fs/sc/scf/index_en.html)). Ebisch *et al.* (2003) have shown that the sperm concentration was significantly increased by folic acid and zinc sulphate treatment from the fertile and subfertile men of the MTHFR CC types but not from the MTHFR CT and TT types.

We investigated the tHcy and folate levels from the sera of 46 infertile patients, but those levels were not closely associated

**Table VI.** The serum homocysteine (tHcy) and folate levels of 46 selected patients in relation to the genotypes of folate metabolism enzymes

|                                   | MTHFR 677C→T |              |              | MS 2756A→G   |               |              | MTRR 66A→G   |              |              |
|-----------------------------------|--------------|--------------|--------------|--------------|---------------|--------------|--------------|--------------|--------------|
|                                   | CC           | CT           | TT           | AA           | AG            | GG           | AA           | AG           | GG           |
| Number of individuals             | 18           | 15           | 13           | 31           | 5             | 10           | 11           | 15           | 20           |
| Serum tHcy <sup>a</sup> (μmol/l)  | 10.23 (±2.6) | 9.26 (±1.7)  | 10.87 (±3.1) | 9.90 (±2.4)  | 13.22 (±2.9)  | 9.14 (±1.4)  | 9.52 (±2.6)  | 10.36 (±2.2) | 10.21 (±2.7) |
| (95% confidence limits)           | (9.01–11.44) | (8.42–10.10) | (9.14–12.60) | (9.06–10.73) | (10.65–15.79) | (8.28–10.00) | (7.96–11.08) | (9.20–11.52) | (9.04–11.37) |
| Serum folate <sup>b</sup> (ng/ml) | 7.80 (±7.0)  | 6.60 (±4.1)  | 5.58 (±2.2)  | 6.44 (±2.8)  | 4.06 (±1.1)   | 8.98 (±9.4)  | 6.44 (±3.8)  | 6.01 (±2.4)  | 7.76 (±6.9)  |
| (95% confidence limits)           | (4.56–11.04) | (4.53–8.67)  | (4.41–6.76)  | (5.46–7.41)  | (3.11–5.01)   | (3.13–14.83) | (5.46–7.41)  | (4.74–7.29)  | (4.73–10.78) |

<sup>a</sup>Standard serum tHcy level = 5.0–13.9 μmol/l.<sup>b</sup>Standard serum folate level = 1.5–16.9 ng/ml.

The values in the parenthesis indicate the standard deviation.

with any genotype or subinfertile group (Table VI). These findings are somewhat inconsistent with those of other studies because we used sera from non-fasting patients. Serum tHcy and folate levels may also reflect differences in individual conditions such as the dietary intake and other genetic and environmental factors. Thus, further investigations are needed with long-term clinical information that would be adjusted for smoking, alcohol consumption, BMI and dietary fibre intake to determine the roles of the three enzymes and the effects that genetics and the folic acid status play in the aetiology of male infertility.

DNA methylation and DNA synthesis have dramatic effects on spermatogenesis (Tanaka *et al.*, 1996; Doerksen *et al.*, 2000; Kelly *et al.*, 2003). Especially, inducing hypomethylation by 5-aza-deoxycytidine treatment inhibited differentiation of the spermatogonia to spermatocytes in a murine model (Raman and Narayan, 1995). Therefore, we also investigated sperm parameters in the OAT group (Table V). There is some correlation of the sperm count and motility according to the genotype of MTHFR C677T and MTRR A66G, but it did not reach the level of significance ( $P > 0.05$ ). We need a more extended patient and normal group data of each genotype for statistical analysis, and we may need to repeat the semen analysis for each patient and control subject to get accurate data. The explanation of our data may lie in the effect that environmental factors and other genes have also on the semen quality.

Our result shows a clearer association of MTHFR and MTRR genotypes with non-obstructive male infertility as a whole. By classifying the infertile patients into the azoospermia group and the OAT patient group, the frequency of the MTHFR 677TT genotype was increased in the azoospermia group. Interestingly, MS 2756GG was also increased with the azoospermia group, but not in whole infertile group. The MTRR 66GG type was not only associated with the whole group but also with the OAT group (Table IV). Our association study showed that MTHFR C677T, MS A2756G and MTRR A66G genotypes were all important to male infertility. By performing a combined analysis for gene–gene interaction (Table IV), each SNP had independent effects on the subtype of male infertility. The three enzymes are in the same folate cycles but may have different roles in and impact on DNA synthesis and methylation reactions during spermatogenesis.

The SNP of each enzyme may alter the enzyme activity to different degrees depending on its position within the 3D

structure and the amino acid substitution. Previous biochemical genetics studies showed that the MTRR 66GG genotype contributes more than the MTHFR 677TT and MS 2756GG genotypes for the regulation of tHcy levels (Gaughan *et al.*, 2001; Jacques *et al.*, 2003; Zijno *et al.*, 2003). The association of the MTRR 66GG genotype with OAT in this study may have some link to these biochemical findings.

### Acknowledgements

This study was supported by a grant of the Korea Health 21 R&D Project, Ministry of Health & Welfare, Republic of Korea (01-PJ10-PG6-01GN13-0002).

### Supplementary materials

Supplementary material is available online at <http://humrep.oxfordjournals.org/>.

### References

- Ahmadian A, Gharizadeh B, Gustafsson AC, Sterky F, Nyren P, Uhlen M and Lundberg J (2000) Single-nucleotide polymorphism analysis by pyrosequencing. *Anal Biochem* 280, 103–110.
- Anguiano A, Oates RD, Amos JA, Dean M, Gerrard B, Stewart C, Maher TA, White MB and Milunsky A (1992) Congenital bilateral absence of the vas deferens. A primarily genital form of cystic fibrosis. *JAMA* 267, 1794–1797.
- Benchab M, Ajina M, Lornage J, Niveleau A, Durand P and Guerin JF (2003) Quantitation by image analysis of global DNA methylation in human spermatozoa and its prognostic value in in vitro fertilization: a preliminary study. *Fertil Steril* 80, 947–953.
- Bezold G, Lange M and Peter RU (2001) Homozygous methylenetetrahydrofolate reductase C677T mutation and male infertility. *N Engl J Med* 344, 1172–1173.
- Blount BC, Mack MM, Wehr CM, MacGregor JT, Hiatt RA, Wang G, Wickramasinghe SN, Everson RB and Ames BN (1997) Folate deficiency causes uracil misincorporation into human DNA and chromosome breakage: implications for cancer and neuronal damage. *Proc Natl Acad Sci USA* 94, 3290–3295.
- Chen J, Giovannucci E, Hankinson SE, Ma J, Willett WC, Spiegelman D, Kelsey KT and Hunter DJ (1998) A prospective study of methylenetetrahydrofolate reductase and methionine synthase gene polymorphisms, and risk of colorectal adenoma. *Carcinogenesis* 19, 2129–2132.
- Chung IH, Lee HC, Park JH, Ko JJ, Lee SH, Chung TG, Kim HJ, Cha KY and Lee S (2006) The biallelic expression pattern of X-linked genes in Klinefelter syndrome by pyrosequencing. *Am J Med Genet A* 140A, 527–532.
- Doerksen T, Benoit G and Trasler JM (2000) Deoxyribonucleic acid hypomethylation of male germ cells by mitotic and meiotic exposure to 5-azacytidine is associated with altered testicular histology. *Endocrinology* 141, 3235–3244.



- Dohle GR, Halley DJ, Van Hemel JO, van den Ouwel AM, Pieters MH, Weber RF and Govaerts LC (2002) Genetic risk factors in infertile men with severe oligozoospermia and azoospermia. *Hum Reprod* 17,13–16.
- Ebisch IM, van Heerde WL, Thomas CM, van der Put N, Wong WY and Steegers-Theunissen RP (2003) C677T methylenetetrahydrofolate reductase polymorphism interferes with the effects of folic acid and zinc sulfate on sperm concentration. *Fertil Steril* 80,1190–1194.
- Fang JY and Xiao SD (2003) Folic acid, polymorphism of methyl-group metabolism genes, and DNA methylation in relation to GI carcinogenesis. *J Gastroenterol* 38,821–829.
- Foresta C, Moro E and Ferlin A (2001) Y chromosome microdeletions and alterations of spermatogenesis. *Endocr Rev* 22,226–239.
- Friedman G, Goldschmidt N, Friedlander Y, Ben-Yehuda A, Selhub J, Babaey S, Mendel M, Kidron M and Bar-On H (1999) A common mutation A1298C in human methylenetetrahydrofolate reductase gene: association with plasma total homocysteine and folate concentrations. *J Nutr* 129,1656–1661.
- Frosst P, Blom HJ, Milos R, Goyette P, Sheppard CA, Matthews RG, Boers GJ, den Heijer M, Kluijtmans LA, van den Heuvel LP *et al.* (1995) A candidate genetic risk factor for vascular disease: a common mutation in methylenetetrahydrofolate reductase. *Nat Genet* 10,111–113.
- Gaughan DJ, Kluijtmans LA, Barbaux S, McMaster D, Young IS, Yarnell JW, Evans A and Whitehead AS (2001) The methionine synthase reductase (MTRR) A66G polymorphism is a novel genetic determinant of plasma homocysteine concentrations. *Atherosclerosis* 157,451–456.
- Hong YS, Lee MJ, Kim KH, Lee SH, Lee YH, Kim BG, Jeong B, Yoon HR, Nishio H and Kim JY (2004) The C677 mutation in methylene tetrahydrofolate reductase gene: correlation with uric acid and cardiovascular risk factors in elderly Korean men. *J Korean Med Sci* 19,209–213.
- Jacques PF, Bostom AG, Selhub J, Rich S, Ellison RC, Eckfeldt JH, Gravel RA and Rozen R (2003) Effects of polymorphisms of methionine synthase and methionine synthase reductase on total plasma homocysteine in the NHLBI Family Heart Study. *Atherosclerosis* 166,49–55.
- James SJ, Pogribna M, Pogribny IP, Melnyk S, Hine RJ, Gibson JB, Yi P, Tafoya DL, Swenson DH, Wilson VL *et al.* (1999) Abnormal folate metabolism and mutation in the methylenetetrahydrofolate reductase gene may be maternal risk factors for Down syndrome. *Am J Clin Nutr* 70,495–501.
- Kelly TL, Li E and Trasler JM (2003) 5-Aza-2'-deoxycytidine induces alterations in murine spermatogenesis and pregnancy outcome. *J Androl* 24,822–830.
- Kim DH, Ahn YO, Lee BH, Tsuji E, Kiyohara C and Kono S (2004) Methylenetetrahydrofolate reductase polymorphism, alcohol intake, and risks of colon and rectal cancers in Korea. *Cancer Lett* 216,199–205.
- Kruger TF, Menkveld R, Stander FS, Lombard CJ, Van der Merwe JP, van Zyl JA and Smith K (1986) Sperm morphologic features as a prognostic factor in in vitro fertilization. *Fertil Steril* 46,1118–1123.
- Lee S, Lee SH, Chung TG, Kim HJ, Yoon TK, Kwak IP, Park SH, Cha WT, Cho SW and Cha KY (2003) Molecular and cytogenetic characterization of two azoospermic patients with X-autosome translocation. *J Assist Reprod Genet* 20,385–389.
- Ma J, Stampfer MJ, Christensen B, Giovannucci E, Hunter DJ, Chen J, Willett WC, Selhub J, Hennekens CH, Gravel R *et al.* (1999) A polymorphism of the methionine synthase gene: association with plasma folate, vitamin B12, homocyst(e)ine, and colorectal cancer risk. *Cancer Epidemiol Biomarkers Prev* 8,825–829.
- Min H (2001) Folate status and plasma homocysteine concentration of Korean adults. *Korean J Nutr* 34,393–400.
- Park JH, Lee HC, Jeong YM, Chung TG, Kim HJ, Kim NK, Lee SH and Lee S (2005) MTHFR C677T polymorphism associates with unexplained infertile male factors. *J Assist Reprod Genet* 22,361–368.
- van der Put NM, Steegers-Theunissen RP, Frosst P, Trijbels FJ, Eskes TK, van den Heuvel LP, Mariman EC, den Heyer M, Rozen R and Blom HJ (1995) Mutated methylenetetrahydrofolate reductase as a risk factor for spina bifida. *Lancet* 346,1070–1071.
- van der Put NM, Gabreels F, Stevens EM, Smeitink JA, Trijbels FJ, Eskes TK, van den Heuvel LP and Blom HJ (1998) A second common mutation in the methylenetetrahydrofolate reductase gene: an additional risk factor for neural-tube defects? *Am J Hum Genet* 62,1044–1051.
- Raman R and Narayan G (1995) 5-Aza deoxyCytidine-induced inhibition of differentiation of spermatogonia into spermatocytes in the mouse. *Mol Reprod Dev* 42,284–290.
- Simoni M (2001) Molecular diagnosis of Y chromosome microdeletions in Europe: state-of-the-art and quality control. *Hum Reprod* 16,402–409.
- Simoni M, Bakker E, Eurlings MC, Matthijs G, Moro E, Muller CR and Vogt PH (1999) Laboratory guidelines for molecular diagnosis of Y-chromosomal microdeletions. *Int J Androl* 22,292–299.
- Singh K, Singh SK, Sah R, Singh I and Raman R (2005) Mutation C677T in the methylenetetrahydrofolate reductase gene is associated with male infertility in an Indian population. *Int J Androl* 28,115–119.
- Slatery ML, Potter JD, Samowitz W, Schaffer D and Leppert M (1999) Methylenetetrahydrofolate reductase, diet, and risk of colon cancer. *Cancer Epidemiol Biomarkers Prev* 8,513–518.
- Stuppia L, Gatta V, Scarciolla O, Colosimo A, Guanciali-Franchi P, Calabrese G and Palka G (2003) The methylenetetrahydrofolate reductase (MTHFR) C677T polymorphism and male infertility in Italy. *J Endocrinol Invest* 26,620–622.
- Tanaka H, Fujisawa M, Okada H, Arakawa S and Kamidono S (1996) [DNA synthesis in the testes of infertile men with varicocele – image cytometric analysis of proliferating cell nuclear antigen]. *Nippon Hinyokika Gakkai Zasshi* 87,885–891.
- Ueland PM, Hustad S, Schneede J, Refsum H and Vollset SE (2001) Biological and clinical implications of the MTHFR C677T polymorphism. *Trends Pharmacol Sci* 22,195–201.
- Ulvik A and Ueland PM (2001) Single nucleotide polymorphism (SNP) genotyping in unprocessed whole blood and serum by real-time PCR: application to SNPs affecting homocysteine and folate metabolism. *Clin Chem* 47,2050–2053.
- Weisberg I, Tran P, Christensen B, Sibani S and Rozen R (1998) A second genetic polymorphism in methylenetetrahydrofolate reductase (MTHFR) associated with decreased enzyme activity. *Mol Genet Metab* 64,169–172.
- World Health Organization, Laboratory Manual for the Examination of Human Semen and Sperm-Cervical Mucus Interaction (4th ed), Cambridge University Press, Cambridge (1999).
- Wilson A, Platt R, Wu Q, Leclerc D, Christensen B, Yang H, Gravel RA and Rozen R (1999) A common variant in methionine synthase reductase combined with low cobalamin (vitamin B12) increases risk for spina bifida. *Mol Genet Metab* 67,317–323.
- Yoo JH, Choi GD and Kang SS (2000) Pathogenicity of thermolabile methylenetetrahydrofolate reductase for vascular dementia. *Arterioscler Thromb Vasc Biol* 20,1921–1925.
- Zhu WY and Melera PW (2001) Basal levels of metallothionein I and II expression in mouse embryo fibroblasts enhance growth in low folate through a cell cycle mediated pathway. *Cell Biol Int* 25,1261–1269.
- Zhu H, Wicker NJ, Shaw GM, Lammer EJ, Hendricks K, Suarez L, Canfield M and Finnell RH (2003) Homocysteine remethylation enzyme polymorphisms and increased risks for neural tube defects. *Mol Genet Metab* 78,216–221.
- Zijno A, Andreoli C, Leopardi P, Marcon F, Rossi S, Caiola S, Verdina A, Galati R, Cafolla A and Crebelli R (2003) Folate status, metabolic genotype, and biomarkers of genotoxicity in healthy subjects. *Carcinogenesis* 24,1097–1103.

Submitted on January 4, 2006; resubmitted on March 20, 2006, May 11, 2006; accepted on May 17, 2006
